# Supplementary material for: g-C3N4/Bi4O5I2 2D–2D heterojunctional nanosheets with enhanced visible-light photocatalytic activity
Source: Royal Society of Chemistry journal article supplement (doi:10.1039/c5ra24672e), 2016-01-01
Supplement: c5ra24672e1.pdf [file c5ra24672e1.pdf]

## Electronic Supplementary information

### **g-C<sub>3</sub>N<sub>4</sub>/Bi<sub>4</sub>O<sub>5</sub>I<sub>2</sub> 2D-2D heterojunctional nanosheets with enhanced visible-light photocatalytic activity**

Na Tian, Yihe Zhang\*, Chengyin Liu, Shixin Yu, Min Li, Hongwei Huang\*

*Beijing Key Laboratory of Materials Utilization of Nonmetallic Minerals and Solid Wastes, National Laboratory of Mineral Materials, School of Materials Science and Technology, China University of Geosciences, Beijing 100083, PR China*

\*Corresponding author. Tel.: +86-10-82323433.

*E-mail address:* [zyh@cugb.edu.cn](mailto:zyh@cugb.edu.cn) (Y. H. Zhang); [hwh@cugb.edu.cn](mailto:hwh@cugb.edu.cn) (H. W. Huang).

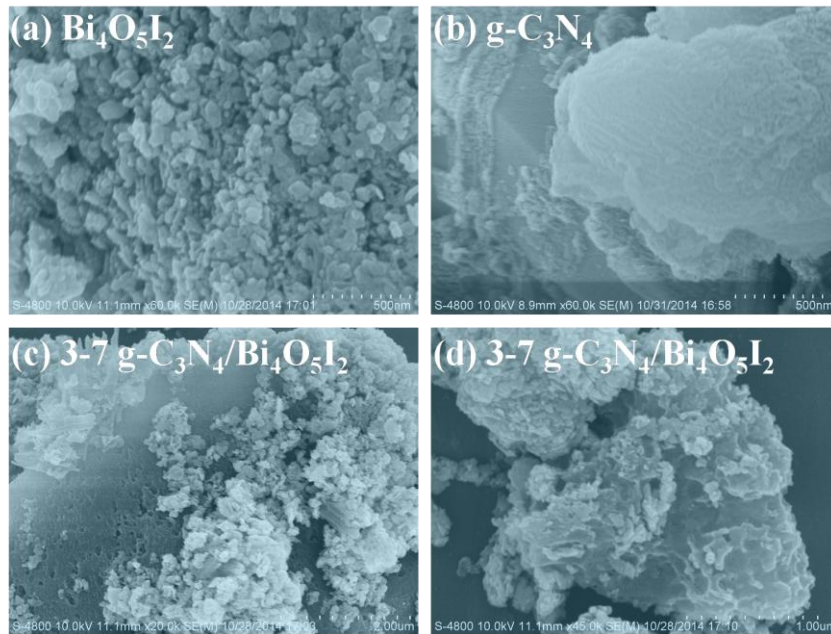

Fig. S1. SEM images of the as-obtained samples: (a)  $\text{Bi}_4\text{O}_5\text{I}_2$ , (b)  $\text{g-C}_3\text{N}_4$ , (c, d)  $3-7 \text{ g-C}_3\text{N}_4/\text{Bi}_4\text{O}_5\text{I}_2$ .

Table. S1. B.E.T surface area data of Bi<sub>4</sub>O<sub>5</sub>I<sub>2</sub>, g-C<sub>3</sub>N<sub>4</sub> and g-C<sub>3</sub>N<sub>4</sub>/Bi<sub>4</sub>O<sub>5</sub>I<sub>2</sub>.

| No. | Sample                                                                             | S <sub>BET</sub> (m <sup>2</sup> /g) |
|-----|------------------------------------------------------------------------------------|--------------------------------------|
| 1   | Bi <sub>4</sub> O <sub>5</sub> I <sub>2</sub>                                      | 23.45                                |
| 2   | 3-7 g-C <sub>3</sub> N <sub>4</sub> /Bi <sub>4</sub> O <sub>5</sub> I <sub>2</sub> | 17.23                                |
| 3   | 4-6 g-C <sub>3</sub> N <sub>4</sub> /Bi <sub>4</sub> O <sub>5</sub> I <sub>2</sub> | 13.77                                |
| 4   | 5-5 g-C <sub>3</sub> N <sub>4</sub> /Bi <sub>4</sub> O <sub>5</sub> I <sub>2</sub> | 10.21                                |
| 5   | g-C <sub>3</sub> N <sub>4</sub>                                                    | 4.25                                 |
